# Supplementary material for: The influence of π-conjugated moieties on the thermodynamics of cooperatively self-assembling tricarboxamides
Source: Royal Society of Chemistry journal article supplement (doi:10.1039/c3cc43845g), 2013-01-01
Supplement: c3cc43845g.pdf [file c3cc43845g.pdf]

## Supporting Information

### The influence of $\pi$ -conjugated moieties on the thermodynamics of cooperatively self-assembling tricarboxamides

Fátima García,<sup>a</sup> Peter A. Korevaar,<sup>b</sup> Arno Verlee, E. W. Meijer,<sup>b</sup> Anja R. A. Palmans,<sup>b,\*</sup> and Luis Sánchez<sup>a,\*</sup>

<sup>a</sup>*Departamento de Química Orgánica, Facultad de Ciencias Químicas, Universidad Complutense de Madrid, E-28040 Madrid (Spain).*

<sup>b</sup>*Laboratory of Macromolecular and Organic Chemistry and Institute for Complex Molecular Systems, Eindhoven University of Technology, P.O. Box 513, 5600 MB Eindhoven, The Netherlands.*

#### Contents:

|                                                            |            |
|------------------------------------------------------------|------------|
| <i>1.- Materials and methods</i>                           | <i>S-2</i> |
| <i>2.- Supplementary Figures</i>                           | <i>S-2</i> |
| <i>Cooling curves of compounds 1 and (R)-3</i>             | <i>S-2</i> |
| <i>Van't Hoff analysis of compounds 1, (S)-2 and (R)-3</i> | <i>S-2</i> |
| <i>Majority rules of compounds (S)-2 and (R)-3</i>         | <i>S-3</i> |

## 1.- Materials and Methods section

### Synthesis

The oligo(phenylene ethynylene) tricarboxamides **1**, **(S)-2** and **(R)-3**; *N,N',N''*-tris[(S)-3,7-dimethyloctyl]benzene-1,3,5-carboxamide (**(S)-4**) and *N,N,N'*-tris[(S)-3,7-dimethyloctyl]benzene-1,3,5-tris(carbothioamide) (**BTTA**) were synthesized and characterized in accordance with published procedures.<sup>S-1</sup> The solvent, MCH, was obtained from Aldrich in spectrophotometric grade (99%) and used as received.

### Optical spectroscopy

UV-vis and Circular Dichroism measurements were performed on a Jasco J-815 spectropolarimeter where the sensitivity, time constant and scan rate were chosen appropriately. Corresponding temperature-dependent measurements were performed with a PFD-425S/15 Peltier-type temperature controller with a temperature range of 263–383 K and a cooling rate of 60 K/min. In all experiments the linear dichroism was also measured and in all cases no linear dichroism was observed.

---

S-1 (a) F. García, P. M. Viruela, E. Matesanz, E. Ortí, and L. Sánchez, *Chem. Eur. J.* 2011, **17**, 7755; (b) M. M. J. Smulders, A. P. H. J. Schenning and E. W. Meijer, *J. Am. Chem. Soc.* 2008, **130**, 606; (c) T. Mes, S. Cantekin, D. W. R. Balkenende, M. M. M. Frissen, M. A. J. Gillissen, B. F. M. de Waal, I. K. Voets, E. W. Meijer and A. R. A. Palmans, *Chem. Eur. J.* 2013, DOI: 10.1002/chem.201204273.

## 2.- Supplementary Figures and Tables

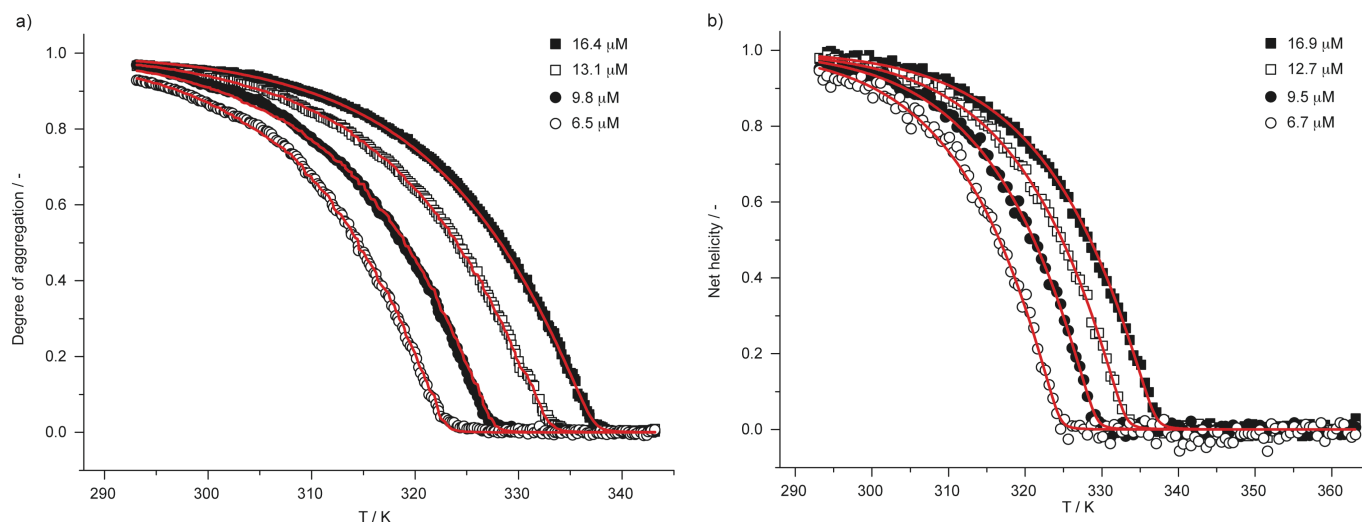

**Figure S1.** UV-Vis and CD cooling curves of compounds **1** measured at 315 nm (a), and **(R)-3** measured at 301 nm (b) in MCH. The red lines in (a) and (b) correspond to the fit to the one-component EQ model reported in reference 4a.

### Van't Hoff analysis

Plotting the  $1/T_e$  versus the natural logarithm of the concentration allows the construction of a van't Hoff plot. From the linear regression of the data, the enthalpy  $\Delta H$  and entropy  $\Delta S$  associated with the self-assembly process can be determined, and the free energy  $\Delta G$  and the corresponding equilibrium constant  $K$  can be calculated (Figure S2).<sup>S-1b</sup> The results are summarised in Table S1.

**Table S1.** Temperatures of elongation  $T_e$  and thermodynamic parameters obtained from the van't Hoff plot for compounds 1-4 in MCH.

| Compound     | Concentration [ $\mu\text{M}$ ] | $T_e$ [K] | $\Delta H$ [kJ/mol] | $\Delta S$ [kJ/mol.K] | $\Delta G^a$ [kJ/mol] |
|--------------|---------------------------------|-----------|---------------------|-----------------------|-----------------------|
| <b>1</b>     | 16.40                           | 336.8     | -56.4               | -0.076                | -33.6                 |
|              | 13.12                           | 331.7     |                     |                       |                       |
|              | 9.85                            | 326.8     |                     |                       |                       |
|              | 6.56                            | 322.4     |                     |                       |                       |
| <b>(S)-2</b> | 15.20                           | 341.4     | -66.4               | -0.102                | -35.9                 |
|              | 12.60                           | 337.7     |                     |                       |                       |
|              | 9.12                            | 334.6     |                     |                       |                       |
|              | 6.08                            | 328.2     |                     |                       |                       |
| <b>(R)-3</b> | 16.90                           | 336.5     | -67.0               | -0.108                | -34.9                 |
|              | 12.70                           | 332.6     |                     |                       |                       |
|              | 9.50                            | 328.8     |                     |                       |                       |
|              | 6.75                            | 324.1     |                     |                       |                       |
| <b>(S)-4</b> | 41.0                            | 342.8     | -73.0               | -0.129                | -34.5                 |
|              | 27.0                            | 337.0     |                     |                       |                       |
|              | 25.0                            | 335.7     |                     |                       |                       |
|              | 14.0                            | 328.2     |                     |                       |                       |
|              | 12.0                            | 327.6     |                     |                       |                       |

a: determined at 298 K

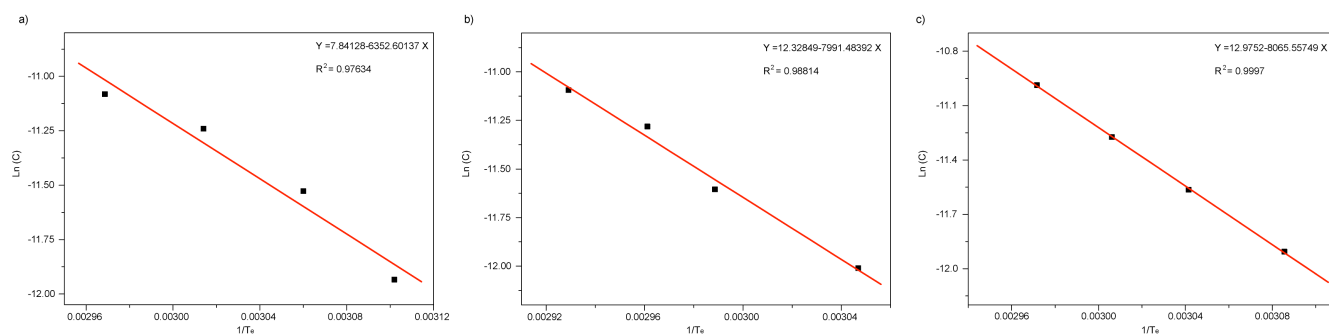

**Fig. S2.** van't Hoff plots of **1** (a), **(S)-2** (b), **(R)-3** (c) and the linear fits to obtain the thermodynamic parameters.

### Majority Rules experiments

To perform the MR experiment, we mix **(S)-2** and **(R)-3** in different ratios at a constant total concentration of 12  $\mu\text{M}$  in MCH at 293 K. The resulting CD values in the two maxima of the bisignated Cotton effect, at 280 nm and 304 nm, display a non-linear dependence on the enantiomeric excess,  $ee$ . Beyond a value of  $ee = 30\%$ , the net helicity is dominated by the major enantiomer.

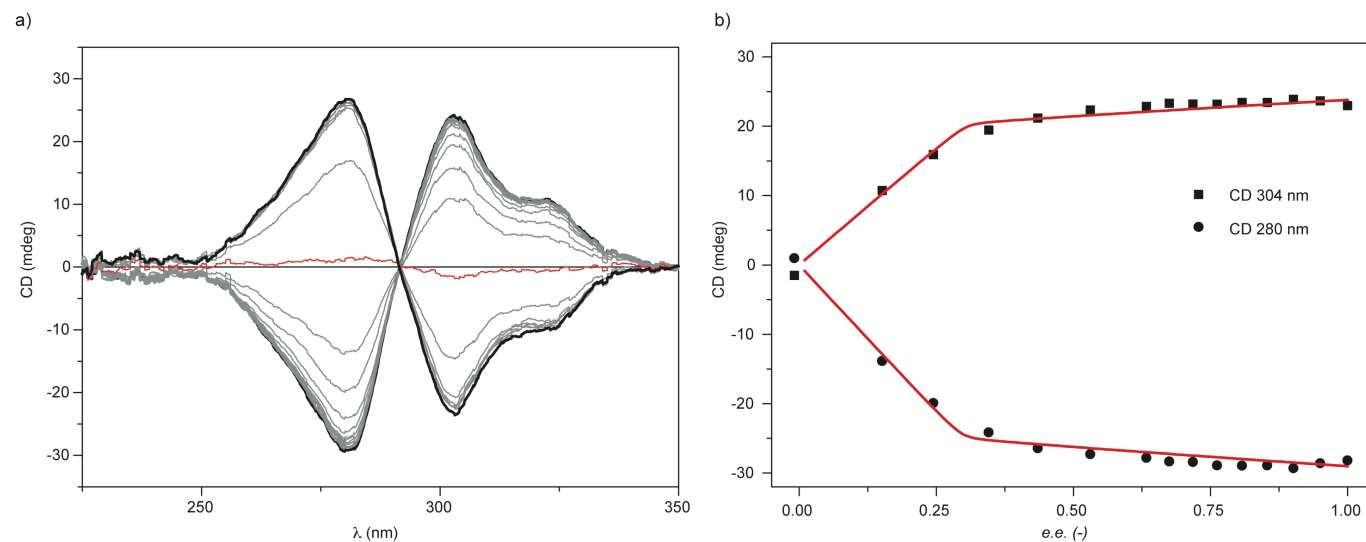

**Fig. S3** (a) CD spectra of mixtures of **(S)-2** (b) and **(R)-3** (MCH, 293 K,  $1.2 \times 10^{-5}$  M). (b) Changes in the CD intensity against the  $ee$  observed upon adding aliquots of **(S)-2** to a solution of **(R)-3** (MCH, 293 K, total concentration =  $1.2 \times 10^{-5}$  M). The red lines represent the fitting to the EQ model.
